# Supplementary material for: Self-assembly of diclofenac prodrug into nanomicelles for enhancing the anti-inflammatory activity
Source: Royal Society of Chemistry journal article supplement (doi:10.1039/d1ra03804d), 2021-01-01

## Supporting Information for

### Self-assembly of diclofenac prodrug into nanomicelles for enhancing the anti-inflammatory activity

Mohyeddin Assali,<sup>a\*</sup> Ramzi Shawahna,<sup>b</sup> Raeda Alhawareen,<sup>a</sup> Haifa Najajreh,<sup>a</sup> Oraib Rabaya,<sup>a</sup> Maryam Faroun,<sup>c</sup> Ahed Zyoud,<sup>d</sup> and Hikmat Hilal<sup>d</sup>

#### 1. Phosphate buffered saline solution (1x, pH = 7.4) preparation procedure:

800 milliliters of distilled water was placed into a container. 8 g of NaCl and 0.2 g of KCl were added into the water. 1.44 g of sodium hydrogen phosphate ( $\text{Na}_2\text{HPO}_4$ ) and 0.24 g of  $\text{KH}_2\text{PO}_4$  were dissolved into the solution. Top off the distilled water until the solution equals 1 liter. The pH was measured with a pH meter and adjusted to 7.4 with hydrochloric acid (1M) if necessary.

#### 2. Calibration curves of diclofenac, Dic-PEG400-Dic, and Dic-PEG600-Dic

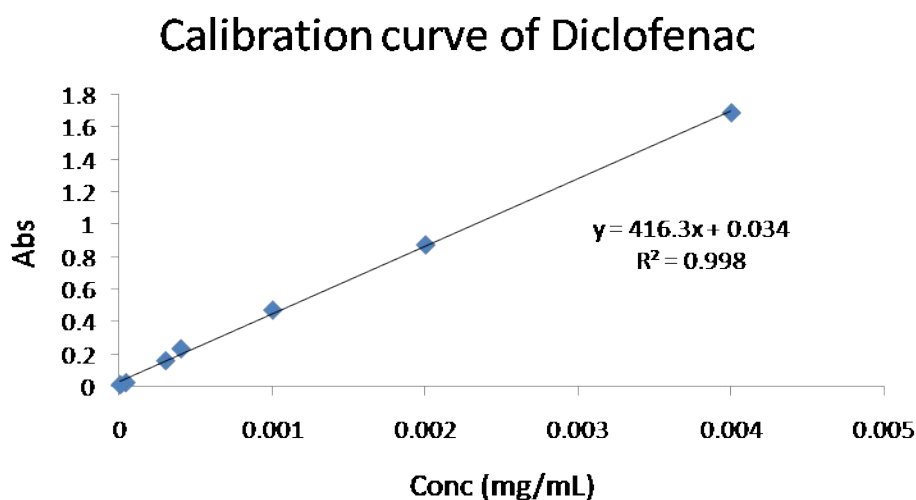

Calibration curve of Dic-PEG400-Dic

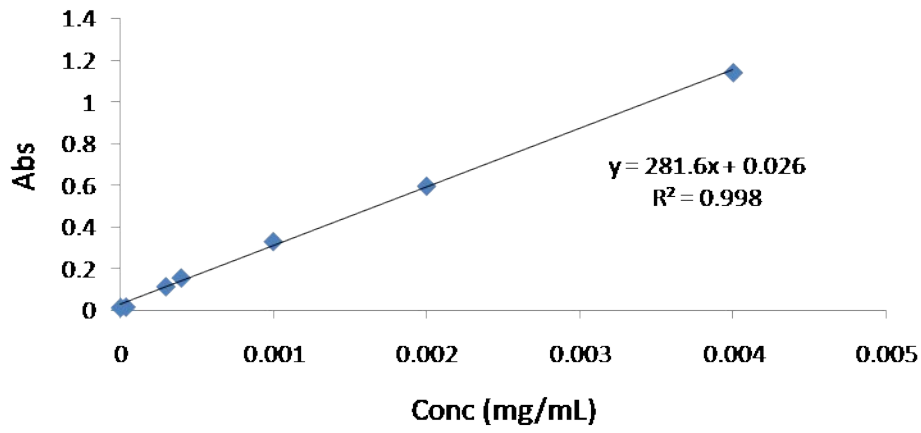

Calibration curve of Dic-PEG600-Dic

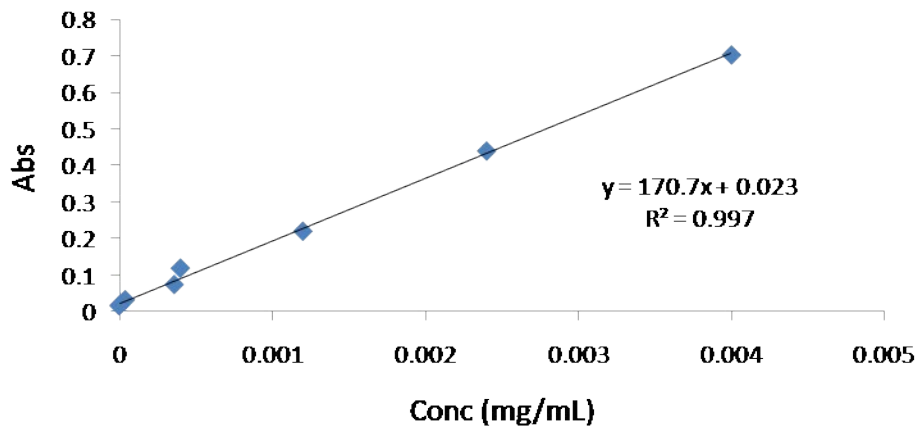

Supplement: d1ra03804d1.pdf [file d1ra03804d1.pdf]
